# Supplementary material
Source: PubMed Central journal article supplement (PMC3933493)
Supplement: epi-8-1330-s01.pdf [file epi-8-1330-s01.pdf]

## **Supplemental Material to:**

**Tianjiao Lyu, Nan Jia, Jieyu Wang, Xiaohui Yan, Yinhua Yu,  
Zhen Lu, Robert C Bast Jr, Keqin Hua, and Weiwei Feng**

**Expression and epigenetic regulation of angiogenesis-  
related factors during dormancy and recurrent growth of  
ovarian carcinoma**

**Epigenetics 2013; 8(12)**

**<http://dx.doi.org/10.4161/epi.26675>**

**<http://www.landesbioscience.com/journals/epigenetics/article/26675>**

Supplemental table 1. Primers for real-time PCR

| Gene    | Primer sequences                                       | Product length(bp) |
|---------|--------------------------------------------------------|--------------------|
| ANG1    | S:AGCTACCACCAACAACAGTG<br>A:CAAAGATTGACAAGGTTGTGG      | 79                 |
| ANG2    | S:TGCCACGGTGAATAATTCAG<br>A:TTCTTCTTTAGCAACAGTGGG      | 124                |
| ANG4    | S:AACAGCGCGCTCGAGAAG<br>A:GCTTCGCCTTCTTGCTGA           | 85                 |
| TSP1    | S:CCTCAGGAACAAAGGCTGCTC<br>A:GCCAATGTAGTTAGTGCGGATG    | 103                |
| IGFBP3  | S:AACTGTGGCCATGACTGAGGA<br>A:CTCCCTGAGCCTGACTTTGC      | 100                |
| ANGPTL2 | S:CCACCCTGGACAGAGATCAT<br>A:CTCGAACTCAGCCCAGTAG        | 168                |
| RECK    | S:CGCGTGGCAGTCGATTACTAT<br>A:GCTGCCAAGAGCGAAGGA        | 107                |
| SPARC   | S:GCGAGCTGGATGAGAACAACAC<br>A:GTGGCAAAGAAGTGGCAGGAAG   | 136                |
| TIE1    | S:GCCCAGATTGCGCTACAG<br>A:ATCAATGCCCGCGTAAGT           | 96                 |
| TIE2    | S:TTGAAGTGGAGAGAAGGTCTG<br>A:GTTGACTCTAGCTCGGACCAC     | 128                |
| TIMP3   | S:TTCTCAGCGAGGATGGCACTT<br>A:AAACACGGTTCAGGATGCTGG     | 200                |
| EFEMP1  | S:CAGCTGACCCTCAGCGCATT<br>A:CAGTTGTGCGTCCCTGCAGT       | 124                |
| SULF1   | S:GGCATTTTGAATCAGCTACACGTA<br>A:TCCCATCCATCCCATAACTGTC | 152                |
| CDH13   | S:TTCAGCAGAAAGTGTTCCATAT<br>A:GTGCATGGACGAACAGAGT      | 204                |

---

|                |                                                   |     |
|----------------|---------------------------------------------------|-----|
| CDH1           | S:CAAGCAGCAGTACATTCTA<br>A:CACTTCCACTCTCTTTTC     | 148 |
| $\beta$ -actin | S:GAAGCTGTGCTATGTTGCTCTA<br>A:GGAGGAAGAGGATGCGGCA | 64  |

---

Supplemental table 2. Primers for bisulfite sequencing PCR

| Gene                | Primer sequences                                                        | Product length(bp) | Annealing temperature(°C) |
|---------------------|-------------------------------------------------------------------------|--------------------|---------------------------|
| ANG1                | S:TTAGAAAATAGTGGGAGAAGATAT<br>AAT<br>A:CCAAATATTA AAAATTTCTAAAAAA<br>AA | 184                | 56                        |
| ANG2                | S:TATTTTGAGTTGTGATTTTGTTTG<br>A:TCTCCAACACTTACAACCTCTACAC               | 233                | 64                        |
| ANG4                | S:TGTTATTAAGATTGAGGAAGGAGGA<br>A:ACAACCAACAATAACCAAACTTAC<br>C          | 205                | 61                        |
| TSP1                | S:GTGGGGTTAGTTTAGGATAGG<br>A:CAAAAAACACCAAAAAAACCATT                    | 124                | 54                        |
| IGFBP3              | S:GTGGGTTTTTGGGGATATAAATAGT<br>A:AATCACTCCTAACCAACTCAACAC               | 278                | 65                        |
| ANGPTL2             | S:TTTAGAGATGAGAATGAGGTTTTTA<br>A:AACCTAACCAACTCTACTCCCTAAC              | 280                | 64                        |
| RECK                | S:TTTAGTGATGAATTTTTGTTAGGGG<br>A:AACTTCTCTCCTTCATATACCCTCA<br>A         | 142                | 62                        |
| SPARC <sup>22</sup> | S:ATTTAGTTTAGAGTTTTGAGTGG<br>A:ACAAAACCTCCCTCCCTTAC                     | 221                | 56.5                      |
| TIE1                | S:TGTTGTTTATAAATGGTTAAGATGG<br>TAAA<br>A:CTTACCTCAACCTCCCAAATAACTA      | 220                | 57.2                      |
| TIE2                | S:TGGTTTTTTGGGGTTATATTGAGTA<br>A:ACTAAAAATAACAAACCCTCCACC<br>TATA       | 270                | 51.1                      |
| TIMP3 <sup>23</sup> | S:GCGGCCGCGTTAGAGATATTTAGTG<br>GTTTAG<br>A:CCCTCAAACCAATAACAAAAC        | 263                | 50.3                      |

|        |                                                                         |     |      |
|--------|-------------------------------------------------------------------------|-----|------|
| EFEMP1 | S:TATTTGGATTTTATAGGAGTTGGTT<br>AGA<br>A:CTCTTTTTTCTTATCAATCTAAATC<br>CC | 223 | 59   |
| SULF1  | S:GGTTATTTGATTGGGAGTTTTTAGAT<br>A:AACAAAACAACCTTCCTTCTCTTAA<br>T        | 212 | 51.7 |
| CDH13  | F:TTGGAAAAGTGGAAATTAGTTGGTAT<br>R:ACCAAAACCAATAACTTTACAAAA<br>C         | 187 | 55   |
| CDH1   | S:GTTGTTGTTGTTGTTGTAGGTATTT<br>A:CCACTCCATCACTAAAAAATC                  | 197 | 54.9 |

Supplemental table 3. Primers for CHIP-PCR

| Gene  | Primer sequences                                                 | Product length(bp) |
|-------|------------------------------------------------------------------|--------------------|
| CDH1  | S: ACTCCAGGCTAGAGGGTCACC<br>A: CCGCAAGCTCACAGGTGCTTTGC<br>AGTTCC | 219                |
| TIMP3 | S:GCAACTCCGACATCGGTAAG<br>A:GCCCAAGGACATCGAGTTT                  | 167                |

A

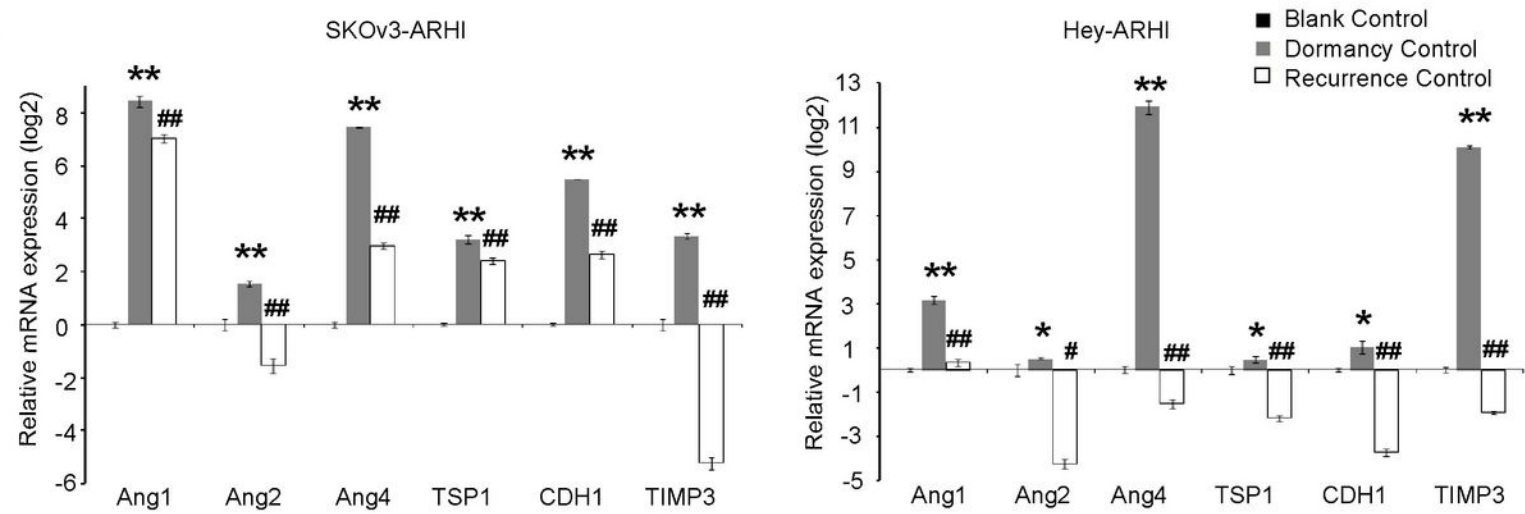

B

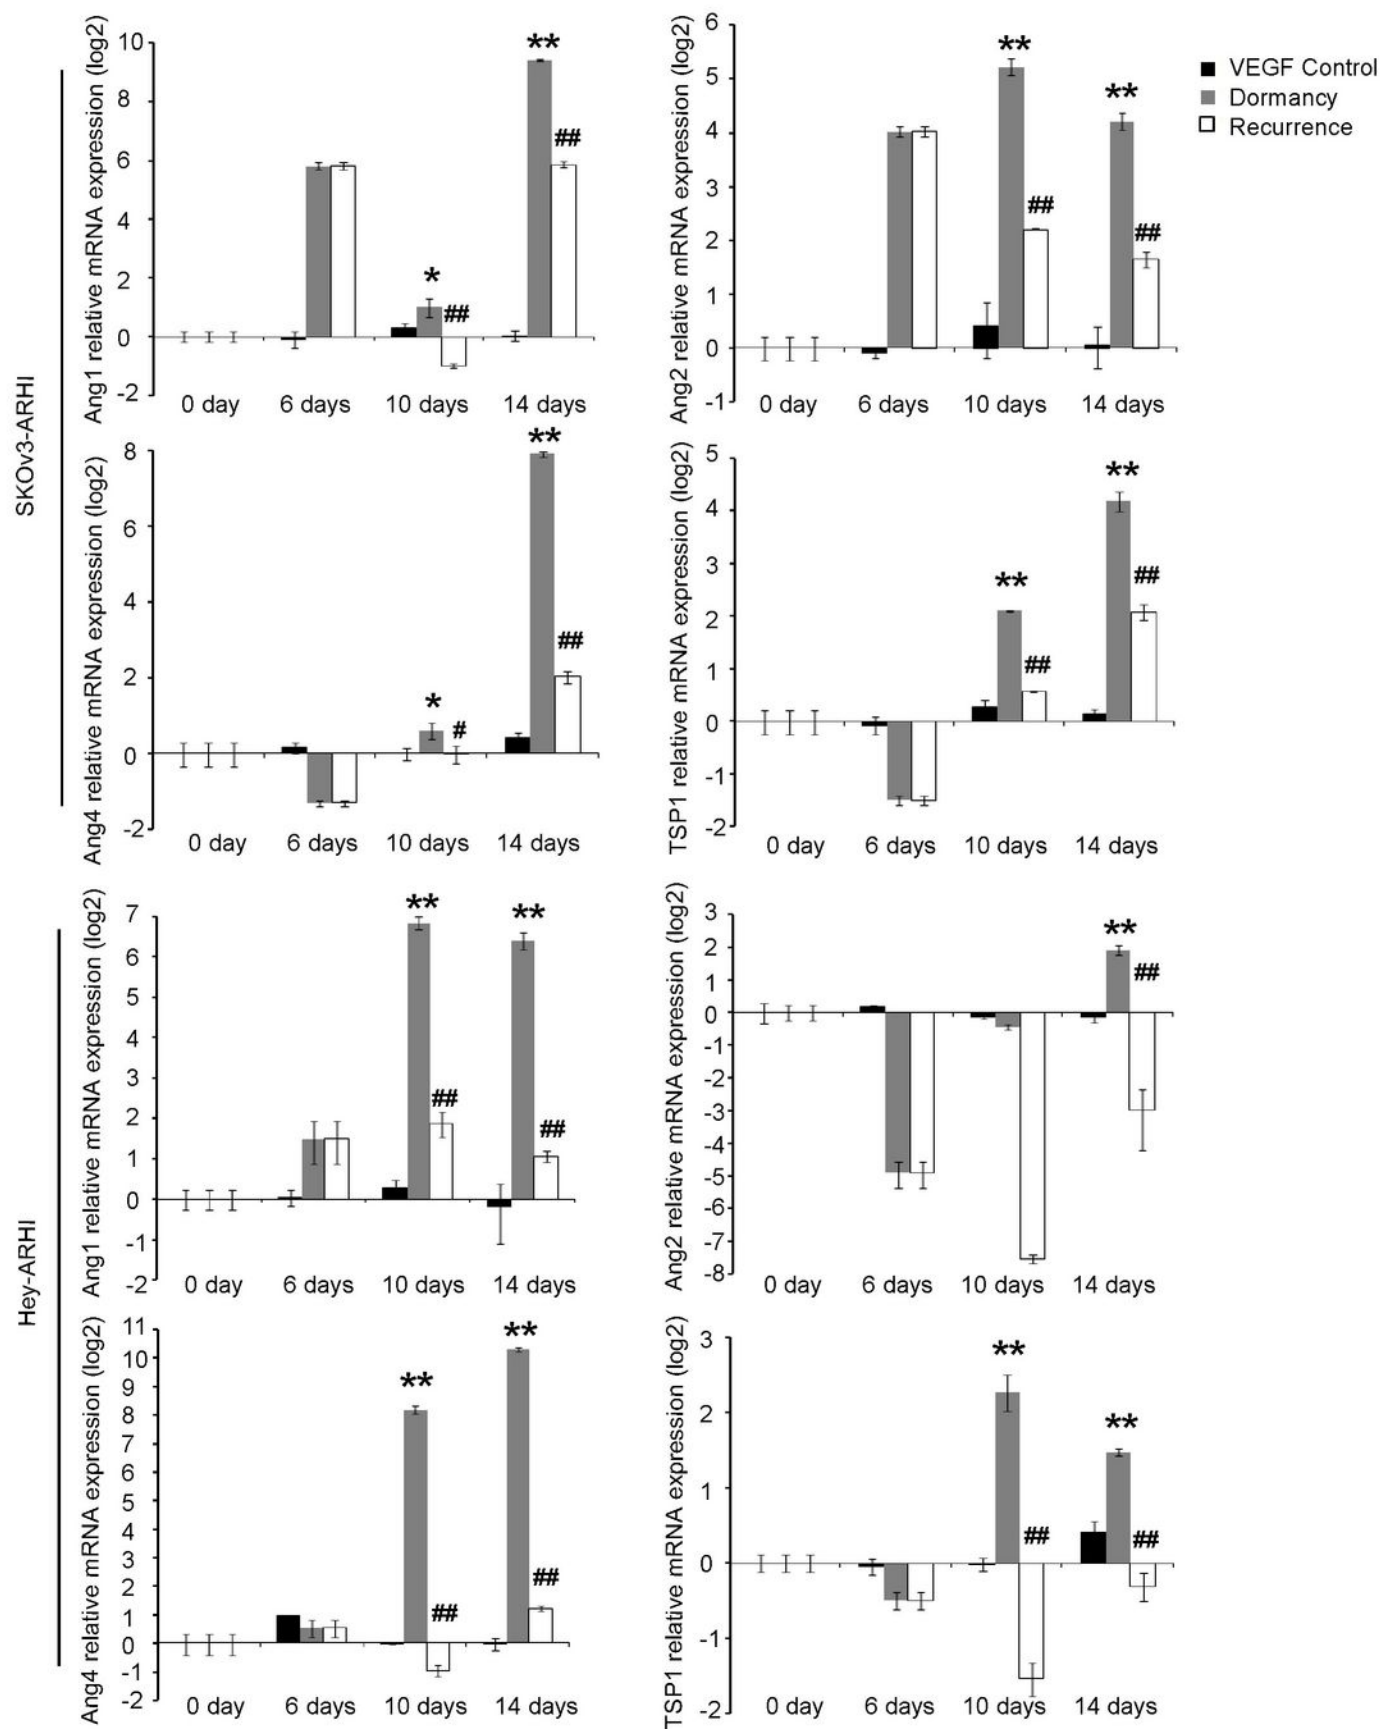

## SKOV3-ARHI

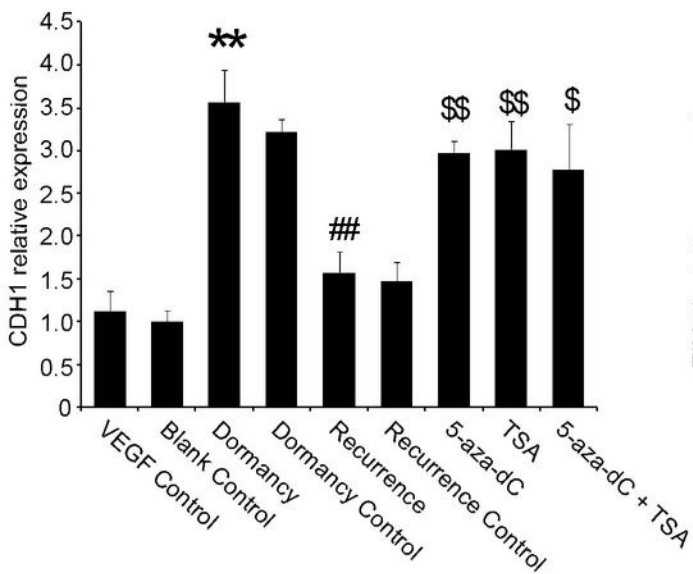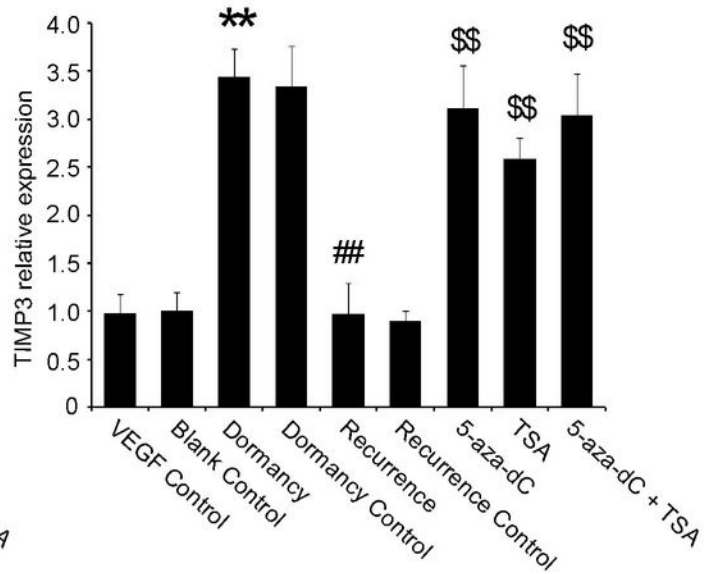

## Hey-ARHI

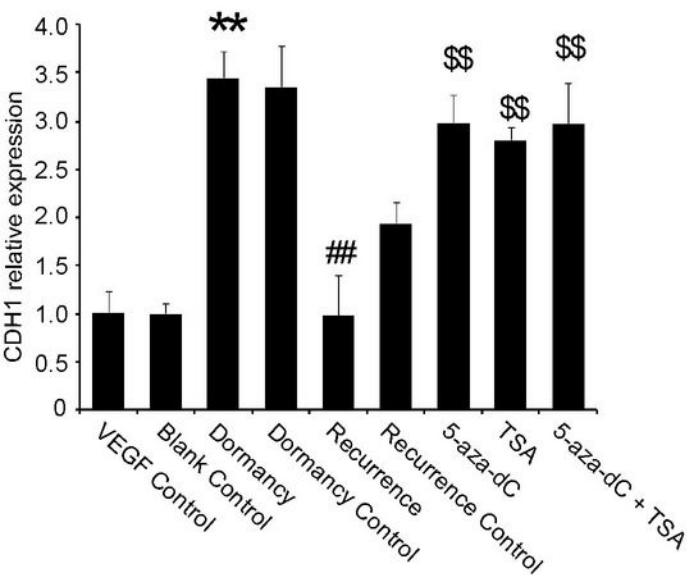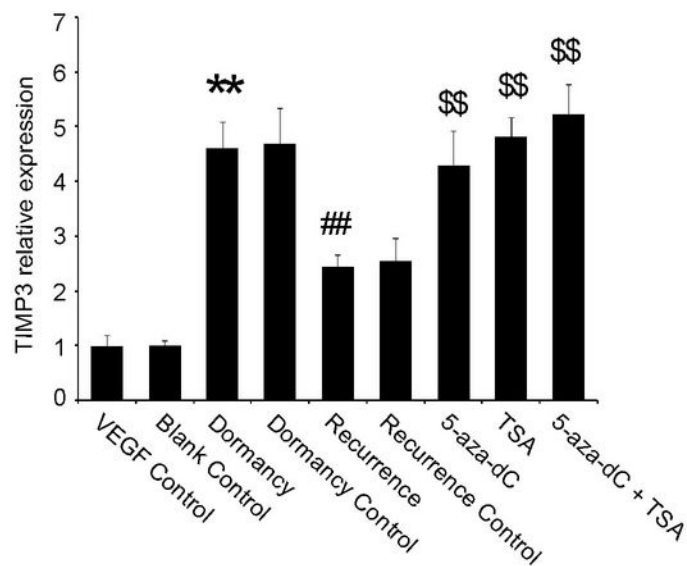

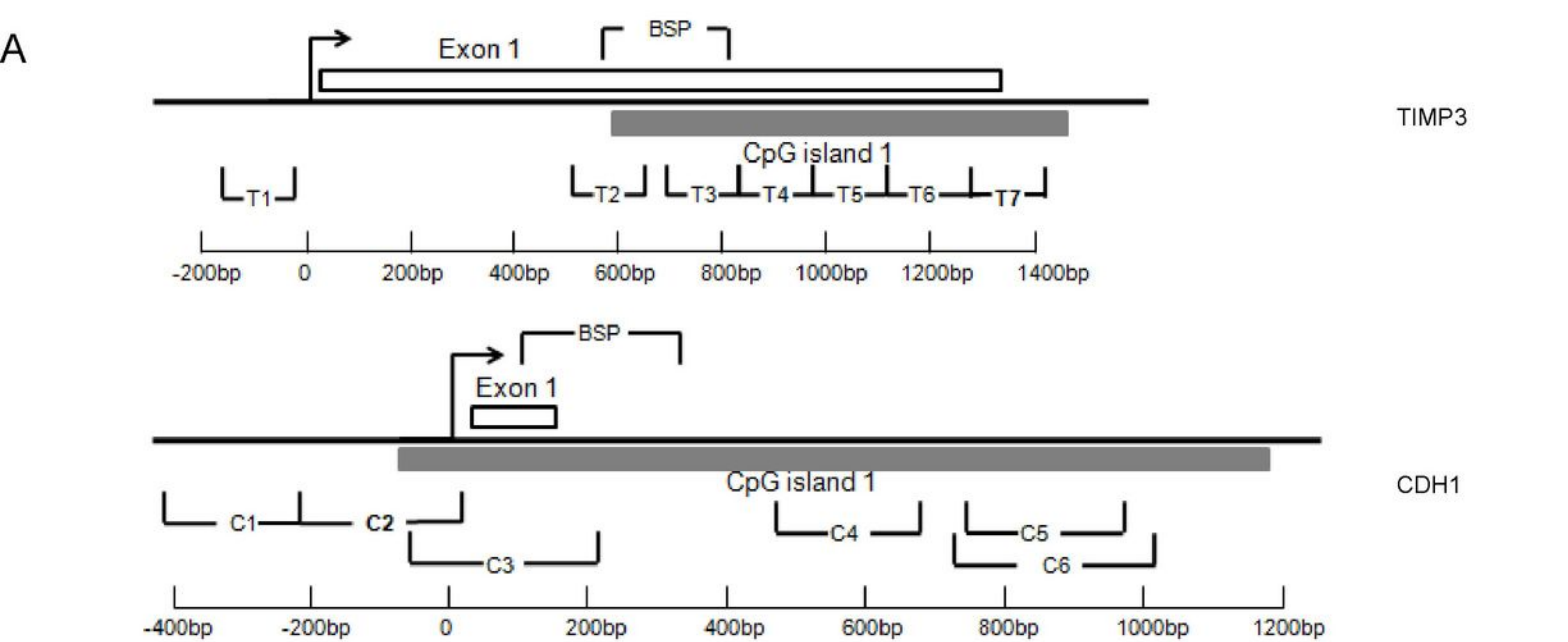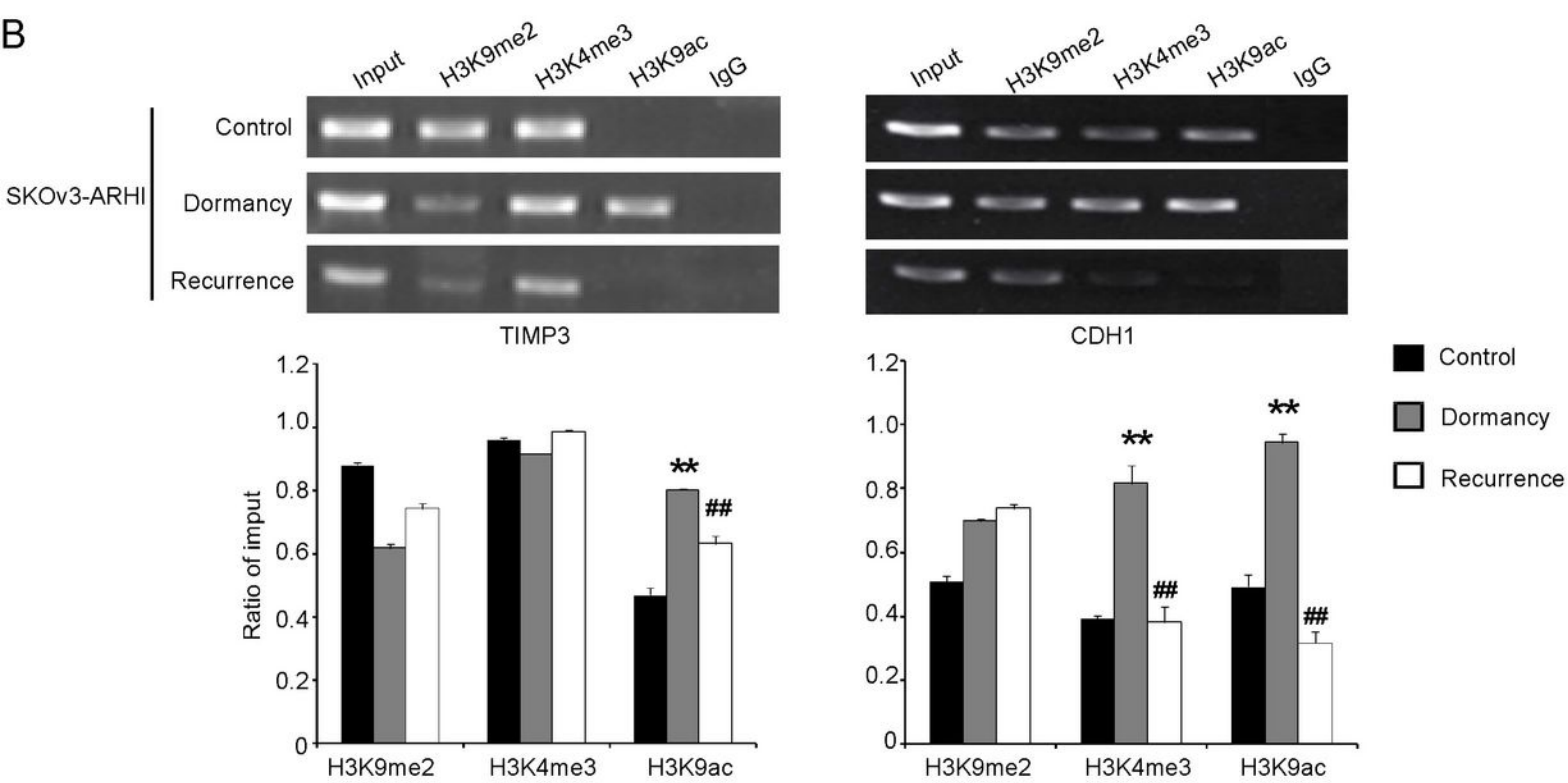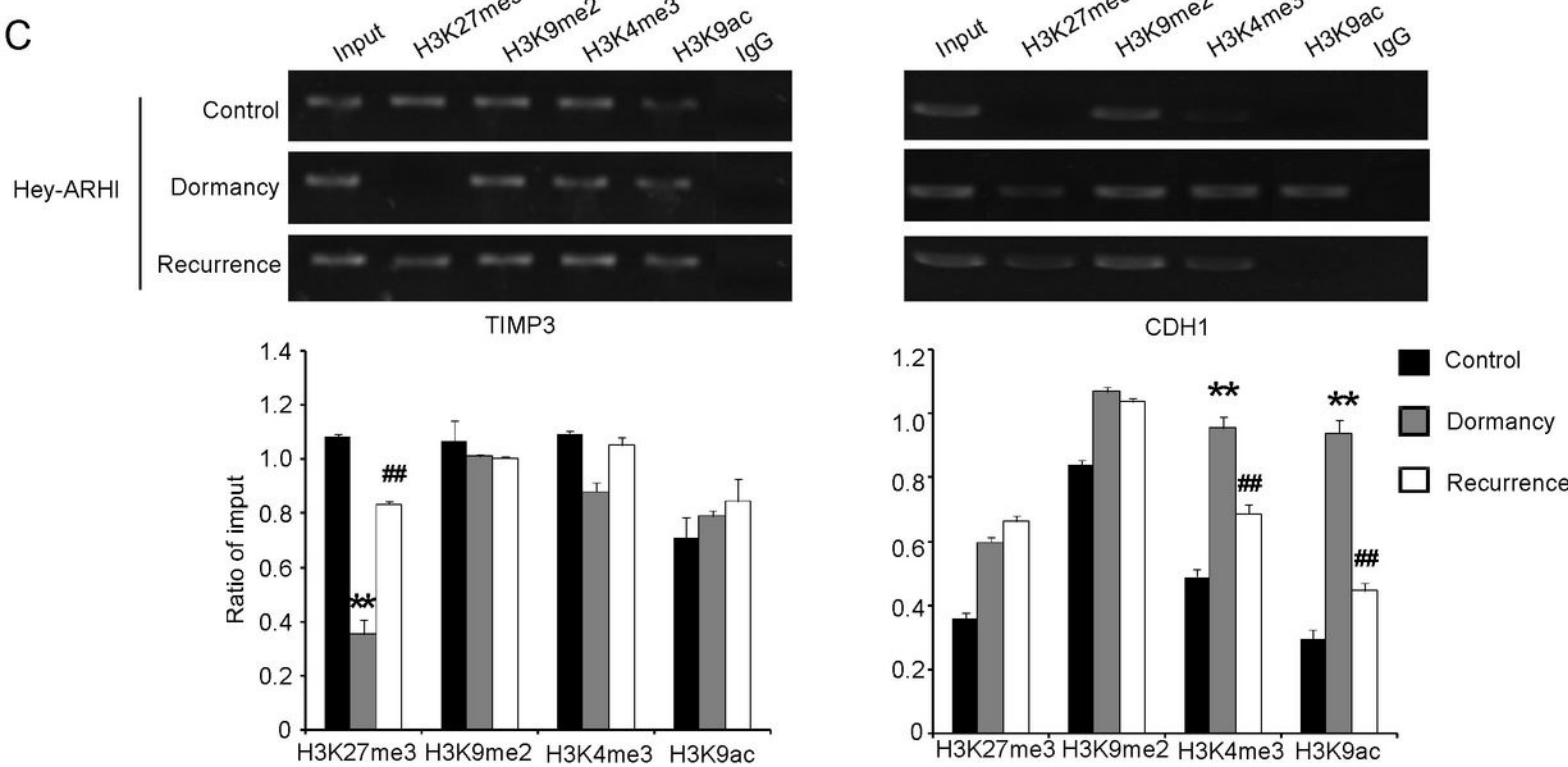



A

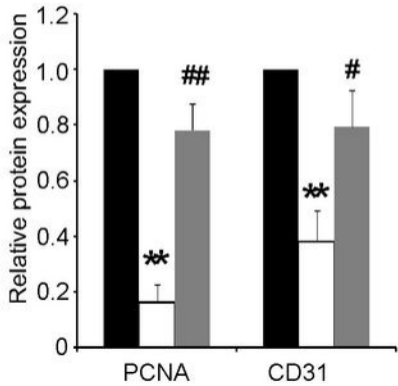

B

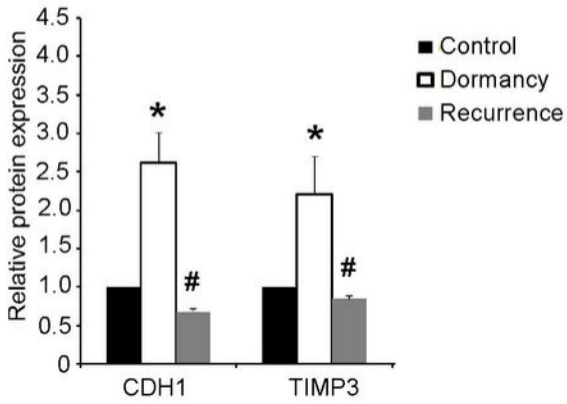

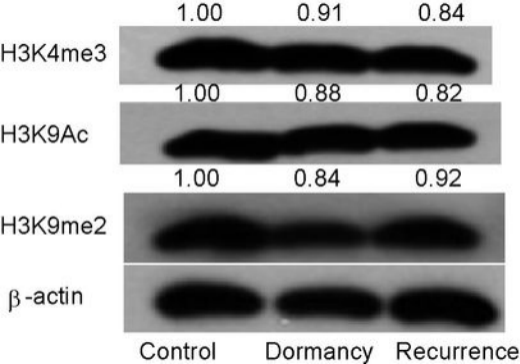

**Supplemental Figure 1.** Angiogenesis-related genes were differentially expressed in ovarian cancer cells treated with DOX or DOX withdrawal. Ang1, Ang2, Ang4 and TSP1 dynamically express during the dormancy-to-recurrence transition. (A) Expression of angiogenesis-related factors in three non-VEGF control groups of SKOv3-ARHI and Hey-ARHI cells. (B) Dynamic expression of Ang1, Ang2, Ang4 and TSP1 during the dormancy-to-recurrence transition during a time line of 0, 6, 10 and 14 days, as measured by real-time PCR in SKOv3-ARHI and Hey-ARHI cells. \*Compared with the VEGF control group,  $P < 0.05$ , \*\* Compared with the VEGF control group,  $P < 0.01$ , #Compared with the dormancy group,  $P < 0.01$ . ##Compared with the dormancy group,  $P < 0.01$ .

**Supplemental Figure 2.** The TIMP3 and CDH1 protein levels were semi-quantified according to immunocytochemistry experiments. \*\*Compared with the control group,  $P < 0.05$ . ##Compared with the dormancy group,  $P < 0.05$ . \$Compared with the recurrence group,  $P < 0.05$ ; \$\$Compared with the recurrence group,  $P < 0.05$

**Supplemental Figure 3.** H3K9Ac, H3K4me3, and H3K27me3 may regulate the expression of *TIMP3* and *CDH1*. (A) Design of primers for BSP and ChIP analysis across the promoter and exon 1 of *TIMP3* and *CDH1*. Seven pairs of ChIP primers for *TIMP3* and 6 pairs of ChIP primers for *CDH1* were tested. T1~T7 and C1~C6 mean the respective location of the PCR products. The results showed that the histone markers were modulated in the T7 (*TIMP3*) and C2 (*CDH1*) regions. The T7 and C2 primers were used in the subsequent ChIP experiments. (B) H3K4me3, H3K9me2, and H3K9Ac at the

*TIMP3* and *CDH1* promoter were analyzed by ChIP analysis in the SKOV3-ARHI cells. (C) H3K27me3, H3K4me3, H3K9me2, and H3K9Ac at the *TIMP3* and *CDH1* promoter were analyzed by ChIP analysis in the Hey-ARHI cells. The acetylation and methylation levels were expressed as the ratio of the signal intensity of the immunoprecipitation product (IP) to the input (see Methods). \*\*Compared with the control group,  $P < 0.01$ . ##Compared with the recurrence group,  $P < 0.01$ . Independent ChIP experiments were repeated at least twice to confirm the reproducibility of the results.

**Supplemental Figure 4.** PCNA, CD31, *TIMP3* and *CDH1* protein levels were semi-quantified in the in-vivo dormancy-to-recurrence transition model. (A) Semi-quantitative PCNA and CD31 protein levels in the in-vivo dormancy-to-recurrence transition model. The scores were made according to immunohistochemistry experiments (Fig. 7) (B) Semi-quantitative *TIMP3* and *CDH1* protein levels in the in-vivo dormancy-to-recurrence transition model. The scores were made according to immunohistochemistry experiments (Fig. 8). \* Compared with the control group,  $P < 0.05$ . \*\* Compared with the control group,  $P < 0.01$ . #Compared with the dormancy group,  $P < 0.05$ . ##Compared with the dormancy group,  $P < 0.01$ .

**Supplemental Figure 5.** No significant changes in the general histone modification were found during the transition from dormancy to recurrent growth in vivo.

**Supplemental Table 1.** Primers for real-time PCR.

**Supplemental Table 2.** Primers for bisulfite sequencing PCR.

**Supplemental Table 3.** Primers for ChIP-PCR.
